1 **Obesity impairs resistance to *Leishmania major* infection in C57BL/6 mice.**

2

3 Franciele Carolina Silva<sup>1\*</sup>; Vinicius Dantas Martins<sup>1\*</sup>; Felipe Caixeta<sup>2</sup>; Matheus Batista  
4 Carneiro<sup>1,3</sup>; Grazielle Ribeiro Goes<sup>1</sup>; Nivea Carolina Paiva<sup>4</sup>; Cláudia Martins Carneiro<sup>4</sup>; Leda  
5 Quercia Vieira<sup>1</sup>; Ana Maria Caetano Faria<sup>1</sup>; Tatiani Uceli Maioli<sup>2&</sup>.

6

7 <sup>1</sup> Departamento de Bioquímica e Imunologia, Instituto de Ciências Biológicas, Universidade  
8 Federal de Minas Gerais, Belo Horizonte, Brazil.

9 <sup>2</sup> Departamento de Nutrição, Escola de Enfermagem, Universidade Federal de Minas Gerais,  
10 Belo Horizonte, Brazil.

11 <sup>3</sup> Snyder Institute for Chronic Diseases, Departments of Microbiology, Immunology and  
12 Infectious Disease, Cumming School of Medicine, University of Calgary.

13 <sup>4</sup> Núcleo de Pesquisa em Ciências Biológicas, Instituto de Ciências Exatas e Biológicas,  
14 Universidade Federal de Ouro Preto, Ouro Preto, Brazil.

15

16 &Corresponding author

17 Email: [tatianimaioli@gmail.com](mailto:tatianimaioli@gmail.com) (MAIOLI, T.U.)

18 Telephone: +5531 34099858 Fax: +5531 34092640

19

20 \*These authors contribute equally.

21

22 **Abstract**

23 An association between increased susceptibility to infectious diseases and obesity has been  
24 described as a result of impaired immunity in obese individuals. It is not clear whether a similar  
25 linkage can be drawn between obesity and parasitic diseases. To evaluate the effect of obesity  
26 in the immune response to cutaneous *L. major* infection, we studied the ability of C57BL/6 mice  
27 submitted to a high fat and sugar diet to control leishmaniasis. Mice with diet-induced obesity  
28 presented thicker lesions with higher parasite burden and more inflammatory infiltrate in the  
29 infected ear when infected with *L. major*. We observe no difference in IFN- $\gamma$  or IL-4 production  
30 by draining lymph node cells between control and obese mice, but obese mice presented  
31 higher production of IgG1 and IL-17. A higher percentage of *in vitro*-infected peritoneal  
32 macrophages was found when these cells were obtained from obese mice when compared to  
33 lean mice. *In vitro* stimulation of macrophages with IL-17 decreased the capacity of cells from  
34 control mice to kill the parasite. Moreover, macrophages from obese mice presented higher  
35 arginase activity. Together our results indicate that diet-induced obesity impairs resistance to *L.*  
36 *major* in C57BL/6 mice without affecting the development of Th1 response.

37

38 **Key words:** diet-induced obesity, *Leishmania*, immune response, inflammation.

39

## 40 **Author Summary**

41 The obesity is a public health problem and it is reaching extraordinary numbers in the world  
42 and others diseases are being involved and aggravated as consequence of obesity. What we  
43 know is that some diseases are more severe in obese people than in normal people. We did not  
44 know how obesity changes the profile of immune response to infectious agents, leading to the  
45 more severe diseases. That`s why we decided to investigate how obese mice lead with  
46 *Leishmania major* infection. Leishmaniasis is a protozoa parasite infection considered a  
47 neglected disease. To try our hypothesis we gave a hipercaloric diet to induce obesity in  
48 C57BL/6 mice. After that, we injected *L. major* in the mice ear and followed the lesion for 8  
49 weeks. We observed a ticker lesion and the cells from draining lymph node from obese mice  
50 produced more IL-17 than cells from normal mice. We also infected in *vitro*, macrophages from  
51 obese mice and stimulated the cells with IL-17, and we observed that the macrophages from  
52 obese mice are more infected by the *L. major* and it is worst in the presence of IL-17. Our  
53 results suggest that diet induced obesity decrease the resistance to infection.

54

## 55 **Introduction**

56 Obesity is characterized by excessive fat accumulation, and it is considered a multifactorial  
57 chronic disease that has increased globally in westernized world over the last decades. It is  
58 associated with metabolic syndrome that includes insulin resistance, type 2 diabetes mellitus,

59 dyslipidemia and hypertension, and also leads to respiratory diseases, hepatic steatosis,  
60 polycystic ovary syndrome, infertility, cancer, stroke, osteoarthritis, among others (1).

61 Metabolic syndrome and co-morbidities associated with obesity occur in an environment  
62 characterized by the presence of a chronic low-grade inflammation (2,3). The link between  
63 obesity and inflammation started to be established in early 1990's when researchers  
64 demonstrated that TNF- $\alpha$  expression was elevated in adipose tissue and that it was related to  
65 insulin resistance (4). Since then, many studies have confirmed that adipose tissue produces  
66 cytokines with pro-inflammatory characteristics (5) that are responsible for increased  
67 macrophage recruitment (6,7) and for decrease in dendritic cell (DC) and natural killer cell (NK)  
68 functions (8,9). In addition, obesity alters the profile of T cells in adipose tissue (10). While T  
69 helper 1 (Th1) and T CD8+ are increased in the adipose tissue of obese animals (7), regulatory T  
70 cells are reduced (11,12). These alterations in immune cells may cause alterations in immune  
71 responses in obese individuals.

72 It was described that obesity increases the susceptibility to infection by different agents such as  
73 influenza virus (H1N1) (13), *Helicobacter pylori* (14) and *Staphylococcus aureus* (15). Karlsson  
74 and coworkers showed that obese mice infected with H1N1 virus had increased production of  
75 TNF- $\alpha$  and IL-6. Nevertheless, these animals had a poor memory TCD8+ cell response and were  
76 more susceptible to infection (16). Overweight and obese individuals also have a defective  
77 immune response to H1N1 viral infection (17).

78 Other studies have addressed the effect of obesity on parasite infections. There is a positive  
79 correlation between obesity and increased incidence of *Toxoplasma gondii* infection (18).

80 Interestingly, diet-induced obesity in C57BL/6 mice was protective in a model of cerebral  
81 malaria (19). Hypothalamic obesity in C57BL/6 mice infected with *Plasmodium berghei* ANKA  
82 resulted in decreased parasitemia, but exacerbated inflammation, and increased mortality rate  
83 (20). Leptin-deficient obese mice (ob/ob mice) are also more susceptible to *Trypanosoma cruzi*  
84 infection (21,22). Sarnáglia and coworkers showed that diet-induced obesity promoted  
85 susceptibility to visceral leishmaniasis followed by higher production of pro-inflammatory  
86 cytokines and increased parasite load (23).

87 Together, these results describe contradictory phenomena: obesity causes increase in  
88 inflammatory immune response, but the increased inflammatory response did not lead to  
89 effective control of the microorganisms nor disease.

90 Resistance to *Leishmania major* infection is well characterized in C57BL/6 mice. Induction of an  
91 early Th1 response is necessary to induce resistance. Initial activation of dendritic cells leads to  
92 production of IL-12 (24) that promotes a Th1 response with high levels of IFN- $\gamma$  and TNF- $\alpha$   
93 production, and low levels of IgG1 antibody secretion. The establishment of this polarized  
94 inflammatory environment activates expression of iNOS and NO production in macrophages,  
95 which has leishmanicidal activity (25,26). Since this is a well established model of resistance to  
96 infection, we decided to investigate if obesity would interfere in the outcome of cutaneous  
97 leishmaniasis in C57BL/6 mice.

98 In this study, we showed that obesity did not affect the development of a Th1 response, nor  
99 triggered a Th2 or regulatory immune responses. However, obese mice were more susceptible  
100 to infection. Moreover, the increased IL-17 production found in obese mice in response to

101 infection was not able to control leishmania growth *in vitro*, suggesting that this cytokine may  
102 favor parasite growth. The observed augment of IL-17 response against the parasite provides a  
103 mechanism for the increased susceptibility of obese mice to *L. major* infection. Our results can  
104 bring new insights into the relationship between immune response and obesity in animals  
105 facing a parasite infection with possible repercussions to a clinical scenario of leishmaniosis in  
106 obese individuals.

107

## 108 **Methods**

### 109 **Animals and diet-induced obesity**

110 All experiments were performed using six-eight-week-old female C57BL/6 mice, weighting  
111 approximately 18g, and obtained from the Animal Facility at the Universidade Federal de Minas  
112 Gerais (CEBIO, UFMG – Belo Horizonte, Brazil). All animals were maintained in the Experimental  
113 Animal Facility of Laboratório de Imunobiologia in collective cages (5 animals/cage) in an  
114 environmentally controlled room with a 12-hour light/dark cycle, controlled temperature (28°C)  
115 and unlimited access to water and food. Procedures and manipulation of animals followed the  
116 guidelines of the committees of ethics in research of Universidade Federal de Minas Gerais in  
117 agreement with guidelines of the committees of ethics in research according with Federal Law  
118 #11794, October 8th 2008:

119 [http://www.planalto.gov.br/ccivil\\_03/ato2007-2010/2008/lei/l11794.htm](http://www.planalto.gov.br/ccivil_03/ato2007-2010/2008/lei/l11794.htm).

120 All animal protocols were approved by the Committee on Animal Experiments (CETEA) under  
121 the protocol 338/2012, and it was approved in 01/10/2013. This certificate expires in  
122 01/10/2018.

123 The obesity was induced with high sugar and butter diet (HSB), given *ad libidun* to the mice  
124 (12). The chow was full in micronutrients to do not induce nutritional deficit in mice.  
125 Experimental diet and the control diet was developed according published before by Reeves,  
126 1993 (27).

### 127 **Experimental design**

128 Mice were divided into two groups: control (fed AIN-93G) and obese (fed HSB). Animals were  
129 fed the same diet throughout the experiment. On the 4<sup>th</sup> week of diet consumption, mice were  
130 infected with  $1 \times 10^6$  metacyclic promastigotes of *Leishmania major*. Infection was followed for 8  
131 weeks; body weight, fasting glycaemia, and LDL cholesterol and triglycerides levels were also  
132 measured during this periods. Euthanasia occurred on the second, fourth and eighth weeks  
133 post infection (Fig 1A).

### 134 **Parasites, infection and antigens**

135 *Leishmania (Viannia) major* (WHOMHOM/IL/80/Friedlin) were maintained in Grace`s medium  
136 (GIBCOBRL – Life Technologies, Grand Island, NY, MO, EUA), pH 6.2 supplemented with 20% of  
137 fetal bovine serum (GIBCO), 20µg/mL gentamicin sulfate (Schering-Plough – Rio de Janeiro, RJ,  
138 Brazil) and 2mM de L-glutamine (GIBCOBRL – Life Technologies, Grand Island, NY, MO, EUA)  
139 (supplemented Grace`s), at 25°C. For infection metacyclic promastigote were used  $1 \times 10^6$ ,



140 obtained after 5 days in culture. The parasites were inoculated intradermally in the left ear of  
141 each animal (final volume = 10 $\mu$ l). Lesion development was monitored weekly by the difference  
142 in thickness between infected and uninfected ears.

143 Number of parasites was estimated by limiting dilution as described previously (28). Briefly,  
144 mice were euthanized and the whole ear was removed and cleaned in 70% alcohol. Ears were  
145 fragmented with scissors and grinded in a glass tissue grinder. Tissue debris were removed by  
146 centrifugation at 50 *g* for 1 min and the supernatant was transferred to another tube and  
147 centrifuged at 1,540 *g* for 15 min. Pellet was resuspended in 0.5ml supplemented Grace's  
148 medium. The parasite suspension was then serially diluted in 10-fold dilutions in duplicates to a  
149 final volume of 200 $\mu$ l in 96-well plates. Pipette tips were replaced for each dilution. Plates were  
150 incubated for 10 days at 25°C and examined under an inverted microscope. Results were  
151 expressed as the negative log of the last dilution in which parasites were detected.

152 *Leishmania* antigen was obtained from logarithmic phase cultures of *L. major* promastigotes.  
153 Promastigotes were washed twice in PBS and pellets were submitted to seven cycles of freezing  
154 in liquid nitrogen followed by thawing at 37°C. The preparations were visually inspected for the  
155 presence of intact parasites. Protein content of preparations was assayed by the Lowry method  
156 (29) and adjusted to 1mg/ml protein. Antigen preparation was aliquoted and stored frozen at -  
157 20 °C.

158

159 **Histology**

160 After euthanasia, ear samples were collected and fixed in 80% methanol and 20% dimethyl  
161 sulfoxide (DMSO; Merck, Darmstadt, Germany), embedded in paraffin, cut into 3–5- $\mu$ m sections  
162 and stained with hematoxylin–eosin (H&E-staining) for microscopic analysis. Images were taken  
163 in optical microscopic and are shown in 100x augmentation.

#### 164 **Glycaemia and LDL measuremets**

165 To perform the glyceimic ratings, animals were fasted for 6 hours and blood was collected from  
166 the tail vein. Blood glucose was measured in with a glucometer and strips (Accu - Chek  
167 Performa®). To perform the oral glucose tolerance test (OGTT), glucose was given by gavage at  
168 a concentration of 2g/kg body weight. Measurements were performed with a glucometer and  
169 strips (Accu - Chek Performa®) before glucose gavage and at 15, 30, 60 and 90 minutes later.  
170 For fasting glucose and LDL cholesterol measurements animals were fasted for 6 hours and  
171 blood was collected. The glycaemia and LDL cholesterol levels were measured by enzymatic kit  
172 according to fabricant`s protocol (Bioclin, Quiabasa, MG, Brazil).

#### 173 **Enzyme-linked immunosorbent assay (ELISA) for cytokines and antibodies detection**

174 For cytokines measurement, plates were coated with 50 $\mu$ L/well with monoclonal antibodies  
175 solution (against IFN-  $\gamma$ , TNF-  $\alpha$ , IL -4, IL -10 and IL -17 (1 $\mu$ g/ml) (PeproTech, NJ, US), diluted in  
176 PBS and kept overnight, at room temperature. The enzymatic reaction was revealed by  
177 incubating the plates with a solution containing 0.2  $\mu$ L/mL of H<sub>2</sub>O<sub>2</sub> and 0.5 mg/ml ABTS  
178 ((C<sub>18</sub>H<sub>16</sub>N<sub>4</sub>O<sub>6</sub>S<sub>4</sub>-(NH<sub>4</sub>)<sub>2</sub>) (Sigma-Merk, Germany) in xM citrate buffer pH 5.0 for the development  
179 of a dark green coloration. After this stage, the reactions were stopped by addition of 20 $\mu$ L/well

180 of a solution of SDS 1%. The absorbance ( $\lambda$ 405nm) of each well was obtained by automatic  
181 ELISA reader (Molecular Devices Spectra MAX340).

## 182 **Macrophage culture**

183 Thioglycolate 2% solution was inoculated in the animal's peritoneum, at 8 weeks after diet  
184 consumption, to induce macrophage recruitment. Peritoneal exudate cells were obtained after  
185 72 hours. The collected macrophages were incubated in a 24 well plate onto glass coverslips at  
186 the concentration of  $1 \times 10^5$  cells/ml. Cells were incubated for 2 hours for adhesion and received  
187 5 *L. major* in the stationary phase per macrophage. *In vitro* infection was analyzed by optical  
188 microscopy 4, and 72 hours post infection after instant glass coverslip staining (Panótico,  
189 Laborclin, PA, Brazil) For nitric oxide (NO) and arginase activity, cells were incubated in 96 well  
190 plates in the concentration of  $1 \times 10^6$  cells/ml and infected with 5:1 *L. major*. The supernatant  
191 was collected for nitric oxide measurement at 72h post infection, as well as arginase activity.  
192 Cells were stimulated with 1ng/ml of IFN- $\gamma$ , 1ng/ml of IL-4 and 1ng/ml of IL-17, and 100ng/ml of  
193 LPS.

## 194 **Nitric oxide (NO) detection**

195 Supernatant of macrophage cultures were collected 72h post *in vitro* infection. Nitric oxide  
196 production was measured as nitrite in culture supernatants using the Griess' reaction (30).

## 197 **Arginase Activity**

198 Arginase activity in homogenates of infected macrophages was assayed as described previously  
199 (31) with few modifications. About 35µL macrophage homogenate was incubated in 24-well  
200 plates with 50µL Triton X-100 and plates were shaken for 30min. Arginase was activated with  
201 50µL MnCl<sub>2</sub> (10mM) and 50µL of TRIS-HCl (50mM, pH 7.5) at 55°C for 10 min. Then, 50µL  
202 samples were transferred to a fresh 24-well plate containing 25µL of L-arginine (0.5mM, pH 9.7)  
203 and incubated for 60 min at 37°C. The reaction was stopped by the addition of 400µL of a  
204 mixture of acids and water H<sub>2</sub>SO<sub>4</sub>:H<sub>3</sub>PO<sub>4</sub>:H<sub>2</sub>O (1:3:7). Subsequently, 25µL of 9% 1-phenyl-1,2-  
205 propanodione-2-oxime in ethanol was added and the plates were incubated at 95°C for 45 min  
206 for color development. Reaction mixtures were read at 540nm in a spectrophotometer  
207 (Molecular Devices). One unit of enzyme activity is defined as the amount of enzyme that  
208 catalyzes the formation of 1µmol of urea/min. A standard curve was performed using urea and  
209 the detection limit for the assay was 270µM of urea.

## 210 **Statistical analysis of the data**

211 Data were initially analyzed using the Kolmogorov-Smirnov test to verify normal distribution.  
212 Since all data were normally distributed, Student's *t* test and one-way ANOVA were used to  
213 compare groups. The significance level of *p*<0.05 was adopted.

214

## 215 **Results**

### 216 **Obesity was associated with higher parasite burden**

217 C57BL/6 mice fed HSB-diet started to develop obesity in the 4<sup>th</sup> experimental week. Obese mice  
218 presented a significant increase in body weight when compared with the control group (Fig 1B).  
219 Obesity persisted until the end of the study. We also confirmed the prevalence of metabolic  
220 syndrome in HSB-fed mice by their high levels of blood glucose, altered glucose tolerance test,  
221 high serum levels of LDL cholesterol, triglycerides, and leptin (Sup Fig 1).

222 In order to verify whether obesity would affect the course of infection with *L. major* in C57BL/6,  
223 mice were infected in the left ear with metacyclic promastigotes 4 weeks after HSB-diet  
224 consumption. Ear thicknesses in obese mice were significantly higher than in control mice from  
225 the fifth week post infection on (Fig 1C). Parasite burden was also checked 2, 4 and 8 weeks  
226 post infection. Two weeks post infection and eight weeks post infection obese mice presented  
227 higher parasitism (Fig 1D). Histological analysis of ear samples were performed to search for  
228 differences in the lesion inflammatory profile, and animals from obese group had more  
229 parasites in the second week post infection. In the eighth week post infection, obese mice  
230 presented larger cellular infiltrate, including polymorphonuclear cells and mastocyte  
231 hyperplasia (Fig 2D, E and F).

232

### 233 **Obesity induced increased production of *L. major* specific IgG1**

234 In the eighth week post infection, obese mice presented higher levels of specific circulating IgG,  
235 IgG1 and IgG2a, when compared to the levels found in mice from the control group (Fig 3A, C  
236 and D). Serum IgM levels were higher in obese mice only on the 4<sup>th</sup> week. There was an

237 increase in total IgG, IgG1 and IgG2a levels on the eighth week of infection in obese mice when  
238 compared to their control counterparts suggesting that increased antibody production during  
239 obesity may be associated with a lower efficiency to kill *Leishmania*.

240

241 **Obese C57BL/6 mice showed no impairment in IFN- $\gamma$  production, but had increased IL-17**  
242 **production by draining lymph node cells**

243 Infection with *L. major* in C57BL/6 mice induces a typical Th1 immune response with production  
244 of high levels of IFN- $\gamma$  that activates macrophages, a cell type directly responsible for parasite  
245 control (Hurdayal and Brombacher, 2017). Both control and obese mice produced equivalent  
246 levels of IFN- $\gamma$  by cells from the draining lymph node (Fig 4A). The same result was observed for  
247 TNF- $\alpha$  (Fig 4B). These data suggest that the increase in parasitism observed in obese mice was  
248 not related to a deficient Th1 response.

249 We also evaluated the production of IL-4, IL-10 and IL-17 in cultured cells from draining lymph  
250 nodes. There was no difference in IL-4 or IL-10 secretion between obese mice and control mice  
251 (Fig 4C and 4D). Interestingly, IL-17 production was high on the second week post infection in  
252 both groups. However, in obese mice IL-17 levels stayed high up to 8 weeks of infection, while  
253 they decreased in control mice. IL-17 production has been associated with obesity (32), and  
254 also with uncontrolled cutaneous *Leishmania* infection (33).

255 Cytokine secretion in adipose tissue was also evaluated and no difference was found for IFN- $\gamma$   
256 nor for IL-17. As expected, TNF- $\alpha$  levels were increased in adipose tissue from obese mice

257 before infection, they were decreased two weeks post infection, and there was no difference  
258 between control and obese mice four and eight weeks post infection. IL-10 production in  
259 adipose tissue also presented some differences between obese and control mice. In obese  
260 mice, IL-10 levels were higher before infection and four weeks after infection (Supplementary  
261 Fig 2).

262

263 **Macrophages from obese mice had higher arginase activity and higher parasitism when**  
264 **infected *in vitro* with *L. major***

265 To evaluate macrophage activity in obese mice, we analyzed the degree of infection of  
266 macrophages at times 4 and 72 hours post *in vitro* infection with *L. major*. At 4 hours post  
267 infection, macrophages from obese mice had a higher percentage of infected macrophages as  
268 well as a higher number of amastigotes per macrophage when compared to macrophages from  
269 control mice with obesity (Fig 5A and B), and the infection index was also higher for  
270 macrophages from obese mice 4 hours post infection. Of note, *in vitro* infection was performed  
271 using total promastigotes, and that why there were less amastigotes 72h after infection than 4h  
272 post infection (34). At 72 hours post infection, macrophages from obese mice continued to  
273 harbor more amastigotes/cell than macrophages from control mice (Fig 5B). We observed that  
274 obese mice had their levels of IL-17 increased. To verify whether IL-17 would impair the killing  
275 of amastigotes *in vitro*, we stimulated the cultures with IL-17. It was observed that  
276 macrophages from control mice, when cultured *in vitro* with IL-17, had increased of  
277 amastigotes/cell and higher infection index 4 hours post infection (Fig 5B and 5C). At 72h post

278 infection, macrophages from control mice controlled the infection, especially when stimulated  
279 with IFN- $\gamma$ . Moreover, addition of IL-17 to the cultures impaired the clearance of amastigotes in  
280 infected cells as seen by the infection index in both control and obese groups. These data  
281 suggest that IL-17 may interfere with parasite elimination.

282 We also investigated the production of NO and arginase activity by macrophages from obese  
283 mice. Macrophages from obese mice without any stimulus or stimulated with IFN- $\gamma$  and LPS  
284 produced slightly more NO than cells from control group (Fig 5D). However, arginase activity  
285 was also higher in non-stimulated cells from obese mice, as well as in cells infected with *L.*  
286 *major*. IL-4 stimulation did not increase arginase activity, but arginase activity remained higher  
287 in obese mice. Macrophages from obese mice also displayed higher arginase activity upon  
288 activation with IFN- $\gamma$  and LPS (Fig 5E). Therefore, our data suggest that obesity increases  
289 arginase activity in macrophages.

## 290 **Discussion**

291 The impact of obesity in the immune response to cutaneous leishmaniasis has never been  
292 described before. Our studies showed that C57BL/6 mice with diet-induced obesity present  
293 larger lesions than control mice, and these lesions contained more parasites. We further  
294 investigated the mechanisms that could be causing these differences.

295 There is a gap in the understanding of how obesity affects the course of intracellular infections,  
296 including parasite infections. In accordance with the negative association between obesity and  
297 infectious diseases already described (23,35,36), our study showed that obese mice had higher



298 parasite burden than control mice, failing to control parasite growth. In addition, lesions in  
299 obese mice were larger and more ulcerative than the ones observed in the control group.  
300 Adipose tissue produces cytokines, adipokines, and chemokines which alter the immune  
301 response affecting the recruitment of inflammatory cells such as macrophages, neutrophils and  
302 dendritic cells (37). Obesity also affects T cell differentiation and function, increasing pro-  
303 inflammatory cytokine production (5,38). Considering the “low-grade” inflammation seen in  
304 obesity, one reasonable hypothesis could be that, in the specific case of cutaneous  
305 leishmaniasis, where macrophages require an inflammatory environment to control parasites,  
306 obesity would improve the immune response against *L. major*. However, our data do not  
307 support this hypothesis.

308 Our histological data also detected a higher parasite burden in obese C57BL/6 mice when  
309 compared to mice from the control group further indicating that obesity interferes with control  
310 of parasite growth. Interestingly, lesions of obese mice presented higher degree of cellular  
311 infiltration, but the inflammatory cells had a poor ability to eliminate the parasites.

312 We also measured the antibody response to *L. major* antibody in sera, and found higher levels  
313 of IgG and IgG1 in obese C57BL/6 mice than in control mice eight weeks post infection. As  
314 described in previous studies, susceptibility to *L. major* infection is associated with isotype  
315 switching to IgG1 (39,40). Antibody levels are directly related to parasite number, as antibodies  
316 may form immune complexes that bind to Fcγ receptors (FcγR), inhibiting the proinflammatory  
317 activity of macrophages, without impairing phagocytosis (41). Interestingly, despite favoring  
318 phagocytosis, IgG fails to protect against *L. major*, and even worse, contributes to the

319 pathogenicity itself (42). Indeed, it has been reported that phagocytosis of IgG-opsonized  
320 amastigote forms induces the activation of signaling pathways leading to the production of IL-  
321 10 by macrophages (40).

322 In an attempt to understand why obese C57BL/6 mice had more severe lesions than control  
323 mice, we evaluated cytokine production by these mice. Interestingly, obesity did not affect the  
324 production of IL-4 in C57BL/6 mice. This result differs from previous data that associate obesity  
325 with susceptibility to asthma and allergies, driven by higher IL-4 secretion and Th2  
326 differentiation (43,44). In fact, the balance between Th1 and Th2, as well the cytokine profile  
327 during obesity are controversial. We also showed that TNF- $\alpha$  and IFN- $\gamma$  levels were increased in  
328 both groups at the time points measured. Obese mice did not show overproduction of  
329 proinflammatory cytokines by cells from the draining lymph nodes. It was expected a higher  
330 production of TNF- $\alpha$  and IFN- $\gamma$  in obese mice with in response to parasite antigens, as it was  
331 observed for infection with *Plasmodium berguei* (45) and also for infection with *Leishmania*  
332 *chagasi* (23) in obese C57BL/6 mice. However, obesity did not interfere with TNF- $\alpha$  and IFN- $\gamma$   
333 levels in our study.

334 The role of IL-17 in leishmaniasis has been a subject of debate. Moreover, the role of IL-17, in  
335 general, is still controversial. We found a higher IL-17 production in obese mice, which  
336 presented a more severe lesion with higher parasite burden than the control group. Classically,  
337 IL-17 production is associated with neutrophil recruitment and often is related to  
338 proinflammatory response in various diseases, including autoimmune disorders (46), fungal (47)  
339 ) and bacterial infections (48). However, recent studies have questioned whether IL-17 function

340 is restricted to proinflammatory action (49). IL-17 is produced mainly by Th17 cells, which could  
341 be stimulated by a different combination of cytokines, including TGF- $\beta$ , IL-6, IL-23 and IL-1 $\beta$   
342 (46). Obesity alters the cytokine profile in adipose tissue and in serum, and IL-17 seems to have  
343 a significant role in obesity. Previous studies have shown that production of this cytokine is  
344 elevated in obesity, both in humans and mice (32,50). In line with these reports, our results  
345 showed that cells from draining lymph node of obese infected mice secrete higher levels of IL-17.  
346 Studies on cutaneous leishmaniasis have correlated IL-17 release with increased pathogenicity  
347 in cutaneous leishmaniasis in mice (51,52). Therefore, it is plausible that the increased  
348 susceptibility of obese C57BL/6 to *Leishmania* infection in our model is related to increased IL-  
349 17 production by draining lymph node cells.

350 We also performed *in vitro* infection of macrophages with *L. major* to assess the efficiency of  
351 macrophages from obese C57BL/6 mice to kill the parasites. There was an increased frequency  
352 of infected cells among macrophages from obese mice 4 hours post infection, and a larger  
353 number of amastigotes/cell in macrophages from obese mice 4 and 72 hours post infection.  
354 These results are in line with higher arginase activity detected in macrophages from obese  
355 mice. Interestingly, Sousa and coworkers found that IL-17 increases arginase activity, and favor  
356 parasite growth in BALB/c mice infected with *L. amazonensis* (33). The hallmark of a Th2  
357 response is activation of M2 macrophages and induction of arginase 1, which requires IL-4  
358 produced by Th2 cells. Arginase activity is increased in mice susceptible to cutaneous  
359 leishmaniasis, and this enzyme utilizes arginine as a substrate to induce polyamine production  
360 instead of NO (53). Interestingly, studies on inflammatory bowel disease have demonstrated  
361 that IL-17 induces a “M2-like response”. Moreover, IL-17KO C57BL/6 mice expressed lower

362 levels of mRNA coding for molecules associated with M2 activity, including arginase 1 (54).  
363 Another study showed that IL-17A induces arginase 1 production in a model of human  
364 Papillomavirus (55). In this case, arginase 1 would be active in M2-macrophages. Our *in vitro*  
365 results showed an environment where IFN- $\gamma$  would still be inducing an inflammatory response  
366 in obese mice. In spite of that, IL-17 production compromised the leishmanicidal activity of  
367 macrophages from obese mice and further facilitated parasite growth by increasing arginase  
368 activity.

369 To test the hypothesis that IL-17 could impair leishmania killing by macrophages, we infected  
370 macrophages stimulated *in vitro* with IL-17. IL-17 had no effect on macrophages from obese  
371 mice. However, IL-17 decreased parasite killing by control macrophages activated with IFN- $\gamma$ .

372 Classically, a Th1 response would lead to resistance to *L. major*, while a Th2 response would  
373 lead to susceptibility (56). However, this classical paradigm has been challenged by later  
374 studies on *L. major* infection (39,57). In the present work, we propose IL-17 as an alternative  
375 cytokine that may determine the fate of the immune response against *L. major*. We showed  
376 that diet-induced obesity, a condition associated with IL-17 production, increased susceptibility  
377 of C57BL/6 mice, a mouse strain genetically resistant to *L. major* infection. Therefore, IL-17  
378 could be a potential candidate to explain diverse comorbidities associated with obesity and its  
379 role in models of infection should be better explored.

380 Taken together, our results show that diet-induced obesity in C57BL/6 mice decreased their  
381 capacity to control infection by *L. major*. This might be related induction of IgG1 secretion, IL-17  
382 production and impaired capacity of macrophages to control parasite growth. The present

383 provides novel clues to the relationship between obesity and leishmanial infection in a time  
384 when infection is now being added to the list of health risks associated with obesity.

385

## 386 **Acknowledgments**

387 We would like to thank Ilda Marçal and Hermes dos Reis Ribeiro for her excellent care of the  
388 animal facility, and Maria do Carmo Dias for technical help. We thank Professor Simone  
389 Vasconcelos Generoso for providing the recombinant cytokines used.

390

## 391 **References**

- 392 1. Hotamisligil GS. Inflammation and metabolic disorders. *Nature*. 2006/12/15.  
393 2006;444(7121):860–7.
- 394 2. Cildir G, Akincilar SC, Tergaonkar V. Chronic adipose tissue inflammation: all immune  
395 cells on the stage. *Trends Mol Med*. 2013/06/12. 2013;19(8):487–500.
- 396 3. Hotamisligil GS, Erbay E. Nutrient sensing and inflammation in metabolic diseases. *Nat*  
397 *Rev Immunol*. 2008/11/26. 2008;8(12):923–34.
- 398 4. Hotamisligil GS, Shargill NS, Spiegelman BM. Adipose expression of tumor necrosis  
399 factor- $\alpha$ : direct role in obesity-linked insulin resistance. *Science (80- )*. 1993/01/01.  
400 1993;259(5091):87–91.
- 401 5. Yang H, Youm Y-H, Vandanmagsar B, Ravussin A, Gimble JM, Greenway F, et al. Obesity

- 402 increases the production of proinflammatory mediators from adipose tissue T cells and  
403 compromises TCR repertoire diversity: implications for systemic inflammation and insulin  
404 resistance. *J Immunol.* 2010;185:1836–45.
- 405 6. Lumeng CN, Bodzin JL, Saltiel AR. Obesity induces a phenotypic switch in adipose tissue  
406 macrophage polarization. *J Clin Invest.* 2007/01/04. 2007;117(1):175–84.
- 407 7. Nishimura S, Manabe I, Nagasaki M, Eto K, Yamashita H, Ohsugi M, et al. CD8+ effector T  
408 cells contribute to macrophage recruitment and adipose tissue inflammation in obesity.  
409 *Nat Med.* 2009;15:914–20.
- 410 8. O’Shea D, Cawood TJ, O’Farrelly C, Lynch L. Natural Killer Cells in Obesity: Impaired  
411 Function and Increased Susceptibility to the Effects of Cigarette Smoke. *PLoS One.* San  
412 Francisco, USA: Public Library of Science; 2010;5(1):e8660.
- 413 9. O’Shea D, Corrigan M, Dunne MR, Jackson R, Woods C, Gaoatswe G, et al. Changes in  
414 human dendritic cell number and function in severe obesity may contribute to increased  
415 susceptibility to viral infection. *Int J Obes (Lond).* 2013;37(11):1510–3.
- 416 10. Gerriets VA, MacIver NJ. Role of T cells in malnutrition and obesity. *Front Immunol*  
417 [Internet]. 2014;5(August):379. Available from:  
418 <http://www.ncbi.nlm.nih.gov/pubmed/25157251>
- 419 11. Feuerer M, Herrero L, Cipolletta D, Naaz A, Wong J, Nayer A, et al. Lean, but not obese,  
420 fat is enriched for a unique population of regulatory T cells that affect metabolic  
421 parameters. *Nat Med.* 2009/07/28. 2009;15(8):930–9.
- 422 12. Maioli TU, Gonçalves JL, Miranda MCG, Martins VD, Horta LS, Moreira TG, et al. High

- 423 sugar and butter (HSB) diet induces obesity and metabolic syndrome with decrease in  
424 regulatory T cells in adipose tissue of mice. *Inflamm Res*. 2016;65(2).
- 425 13. Nave H, Beutel G, Kielstein JT. Obesity-related immunodeficiency in patients with  
426 pandemic influenza H1N1. *Lancet Infect Dis*. 2011;11(1):14–5.
- 427 14. Dhurandhar N V, Bailey D, Thomas D. Interaction of obesity and infections. *Obes Rev*  
428 [Internet]. 2015 Sep 10 [cited 2015 Sep 28]; Available from:  
429 <http://www.ncbi.nlm.nih.gov/pubmed/26354800>
- 430 15. Park S, Rich J, Hanses F, Lee JC. Defects in innate immunity predispose C57BL/6J-  
431 Leprdb/Leprdb mice to infection by *Staphylococcus aureus*. *Infect Immun* [Internet].  
432 2009 Mar 1 [cited 2017 Jul 17];77(3):1008–14. Available from:  
433 <http://iai.asm.org/cgi/doi/10.1128/IAI.00976-08>
- 434 16. Karlsson EA, Sheridan PA, Beck MA. Diet-induced obesity in mice reduces the  
435 maintenance of influenza-specific CD8+ memory T cells. *J Nutr* [Internet]. 2010 Sep 1  
436 [cited 2017 Jul 17];140(9):1691–7. Available from:  
437 <http://jn.nutrition.org/cgi/doi/10.3945/jn.110.123653>
- 438 17. Paich HA, Sheridan PA, Handy J, Karlsson EA, Schultz-Cherry S, Hudgens MG, et al.  
439 Overweight and obese adult humans have a defective cellular immune response to  
440 pandemic H1N1 influenza A virus. *Obesity (Silver Spring)* [Internet]. 2013 Nov [cited 2018  
441 May 15];21(11):2377–86. Available from: <http://doi.wiley.com/10.1002/oby.20383>
- 442 18. Reeves GM, Mazaheri S, Snitker S, Langenberg P, Giegling I, Hartmann AM, et al. A  
443 Positive Association between *T. gondii* Seropositivity and Obesity. *Front public Heal*

- 444 [Internet]. 2013;1(December):73. Available from:  
445 [http://www.pubmedcentral.nih.gov/articlerender.fcgi?artid=3872312&tool=pmcentrez&](http://www.pubmedcentral.nih.gov/articlerender.fcgi?artid=3872312&tool=pmcentrez&rendertype=abstract)  
446 [rendertype=abstract](http://www.pubmedcentral.nih.gov/articlerender.fcgi?artid=3872312&tool=pmcentrez&rendertype=abstract)
- 447 19. Robert V, Bourgouin C, Depoix D, Thouvenot C, Lombard M-N, Grellier P. Malaria and  
448 obesity: obese mice are resistant to cerebral malaria. *Malar J. BioMed Central*;  
449 2008;7:81.
- 450 20. de Carvalho RVH, Soares SMA, Gualberto ACM, Evangelista GCM, Duque JAM, Ferreira  
451 AP, et al. Plasmodium berghei ANKA infection results in exacerbated immune responses  
452 from C57BL/6 mice displaying hypothalamic obesity. *Cytokine [Internet]. Elsevier Ltd*;  
453 2015;76(2):545–8. Available from: <http://dx.doi.org/10.1016/j.cyto.2015.01.025>
- 454 21. Nagajyothi F, Desruisseaux MS, Machado FS, Upadhya R, Zhao D, Schwartz GJ, et al.  
455 Response of adipose tissue to early infection with *Trypanosoma cruzi* (Brazil strain). *J*  
456 *Infect Dis.* 2012/02/02. 2012;205(5):830–40.
- 457 22. Nagajyothi F, Zhao D, Machado FS, Weiss LM, Schwartz GJ, Desruisseaux MS, et al.  
458 Crucial role of the central leptin receptor in murine *Trypanosoma cruzi* infection. *J Infect*  
459 *Dis.* 2010;202(7):1104–13.
- 460 23. Sarnágliá GD, Covre LP, Pereira FEL, De Matos Guedes HL, Faria AMC, Dietze R, et al. Diet-  
461 induced obesity promotes systemic inflammation and increased susceptibility to murine  
462 visceral leishmaniasis. *Parasitology.* 2016;143(12).
- 463 24. McDowell MA, Marovich M, Lira R, Braun M, Sacks D. Leishmania priming of human  
464 dendritic cells for CD40 ligand-induced interleukin-12p70 secretion is strain and species



- 465 dependent. *Infect Immun* [Internet]. 2002 Aug [cited 2018 Jan 30];70(8):3994–4001.
- 466 Available from: <http://www.ncbi.nlm.nih.gov/pubmed/12117904>
- 467 25. Scott P. IFN-gamma modulates the early development of Th1 and Th2 responses in a  
468 murine model of cutaneous leishmaniasis. *J Immunol*. 1991/11/01. 1991;147(9):3149–55.
- 469 26. Sacks D, Noben-Trauth N. The immunology of susceptibility and resistance to *Leishmania*  
470 major in mice. *Nat Rev Immunol* [Internet]. 2002 Nov [cited 2014 Oct 28];2(11):845–58.
- 471 Available from: <http://www.ncbi.nlm.nih.gov/pubmed/12415308>
- 472 27. Reeves, Nielsen FH, Fahey GC. AIN-93 purified diets for laboratory rodents: final report of  
473 the American Institute of Nutrition ad hoc writing committee on the reformulation of the  
474 AIN-76A rodent diet. *J Nutr*. 1993;123(11):1939–51.
- 475 28. Afonso LC, Scott P. Immune responses associated with susceptibility of C57BL/10 mice to  
476 *Leishmania amazonensis*. *Infect Immun*. United States; 1993 Jul;61(7):2952–9.
- 477 29. LOWRY OH, ROSEBROUGH NJ, FARR AL, RANDALL RJ. Protein measurement with the  
478 Folin phenol reagent. *J Biol Chem* [Internet]. 1951 Nov [cited 2017 Nov 18];193(1):265–  
479 75. Available from: <http://www.ncbi.nlm.nih.gov/pubmed/14907713>
- 480 30. Green LC, Wagner D a, Glogowski J, Skipper PL, Wishnok JS, Tannenbaum SR. Analysis of  
481 nitrate, nitrite, and [15N]nitrate in biological fluids. *Anal Biochem*. 1982;126(1):131–8.
- 482 31. Corraliza IM, Campo ML, Soler G, Modolell M. Determination of arginase activity in  
483 macrophages: a micromethod. *J Immunol Methods*. Netherlands; 1994 Sep;174(1–  
484 2):231–5.
- 485 32. Endo Y, Asou HK, Matsugae N, Hirahara K, Shinoda K, Tumes DJ, et al. Obesity Drives

- 486 Th17 Cell Differentiation by Inducing the Lipid Metabolic Kinase, ACC1. *Cell Rep.*  
487 2015/08/04. 2015;12(6):1042–55.
- 488 33. Sousa LM, Carneiro MB, Resende ME, Martins LS, Dos Santos LM, Vaz LG, et al.  
489 Neutrophils have a protective role during early stages of *Leishmania amazonensis*  
490 infection in BALB/c mice. *Parasite Immunol.* 2013/10/10. 2014;36(1):13–31.
- 491 34. Da Silva RP, Hall BF, Joiner KA, Sacks DL. CR1, the C3b receptor, mediates binding of  
492 infective *Leishmania major* metacyclic promastigotes to human macrophages. *J Immunol*  
493 [Internet]. 1989 Jul 15 [cited 2018 Jan 31];143(2):617–22. Available from:  
494 <http://www.ncbi.nlm.nih.gov/pubmed/2525590>
- 495 35. Nagajyothi F, Weiss LM, Zhao D, Koba W, Jelicks L a, Cui M-H, et al. High fat diet  
496 modulates *Trypanosoma cruzi* infection associated myocarditis. *PLoS Negl Trop Dis.*  
497 2014;8(10):e3118.
- 498 36. Tanowitz HB, Scherer PE, Mota MM, Figueiredo LM. Adipose Tissue: A Safe Haven for  
499 Parasites? *Trends Parasitol.* Elsevier; 2017 Nov;33(4):276–84.
- 500 37. Boutens L, Stienstra R. Adipose tissue macrophages: going off track during obesity.  
501 *Diabetologia.* 2016;59(5):879–94.
- 502 38. Prado WL do, Lofrano MC, Oyama LM, Dâmaso AR. Obesidade e adipocinas  
503 inflamatórias: implicações práticas para a prescrição de exercício. *Rev Bras Med do*  
504 *Esporte.* 2009;15:378–83.
- 505 39. Noben-Trauth N, Kropf P, Muller I. Susceptibility to *Leishmania major* infection in  
506 interleukin-4-deficient mice. *Science (80- ).* 1996;271(5251):987.

- 507 40. Yang Z, Mosser DM, Zhang X. Activation of the MAPK, ERK, following Leishmania  
508 amazonensis infection of macrophages. *J Immunol.* 2007;178(2):1077–85.
- 509 41. Sutterwala FS, Noel GJ, Salgame P, Mosser DM. Reversal of Proinflammatory Responses  
510 by Ligating the Macrophage Fcγ Receptor Type I. *J Exp Med.* The Rockefeller University  
511 Press; 1998;188(1):217–22.
- 512 42. Miles SA, Conrad SM, Alves RG, Jeronimo SMB, Mosser DM. A role for IgG immune  
513 complexes during infection with the intracellular pathogen Leishmania. *J Exp Med.* The  
514 Rockefeller University Press; 2005;201(5):747–54.
- 515 43. Chen YP, Zhang JH, Li CQ, Sun QX, Jiang XH. Obesity enhances Th2 inflammatory response  
516 via natural killer T cells in a murine model of allergic asthma. *Int J Clin Exp Med.*  
517 2015/12/03. 2015;8(9):15403–12.
- 518 44. Raj D, Kabra SK, Lodha R. Childhood obesity and risk of allergy or asthma. *Immunol*  
519 *Allergy Clin North Am.* 2014;34(4):753–65.
- 520 45. de Carvalho RVH, Soares SMA, Gualberto ACM, Evangelista GCM, Duque JAM, Ferreira  
521 AP, et al. Plasmodium berghei ANKA infection results in exacerbated immune responses  
522 from C57BL/6 mice displaying hypothalamic obesity. *Cytokine* [Internet]. 2015 Jul 31  
523 [cited 2015 Aug 17]; Available from: <http://www.ncbi.nlm.nih.gov/pubmed/26239414>
- 524 46. Wilson NJ, Boniface K, Chan JR, McKenzie BS, Blumenschein WM, Mattson JD, et al.  
525 Development, cytokine profile and function of human interleukin 17-producing helper T  
526 cells. *Nat Immunol.* 2007;8(9):950–7.
- 527 47. Puel A, Cypowyj S, Bustamante J, Wright JF, Liu L, Lim HK, et al. Chronic mucocutaneous

- 528 candidiasis in humans with inborn errors of interleukin-17 immunity. *Science* (80- ).  
529 2011/02/26. 2011;332(6025):65–8.
- 530 48. Matsuzaki G, Umemura M. Interleukin-17 as an effector molecule of innate and acquired  
531 immunity against infections. *Microbiol Immunol*. 2007/12/21. 2007;51(12):1139–47.
- 532 49. Marwaha AK, Leung NJ, McMurchy AN, Levings MK. TH17 Cells in Autoimmunity and  
533 Marwaha, A. K., Leung, N. J., McMurchy, A. N., & Levings, M. K. (2012). TH17 Cells in  
534 Autoimmunity and Immunodeficiency: Protective or Pathogenic? *Frontiers in*  
535 *Immunology*, 3, 129. <https://doi.org/10.3389/fimmu.2012.00129> *Immu*. *Front Immunol*.  
536 2012/06/08. 2012;3:129.
- 537 50. Luczynski W, Grubczak K, Moniuszko M, Glowinska-Olszewska B, Bossowski A. Elevated  
538 levels of Th17 cells in children with central obesity. *Scand J Clin Lab Invest*. 2015/07/29.  
539 2015;75(7):595–601.
- 540 51. Lopez Kostka S, Dinges S, Griewank K, Iwakura Y, Udey MC, von Stebut E. IL-17 promotes  
541 progression of cutaneous leishmaniasis in susceptible mice. *J Immunol [Internet]*. 2009  
542 Mar 1 [cited 2017 Oct 22];182(5):3039–46. Available from:  
543 <http://www.jimmunol.org/cgi/doi/10.4049/jimmunol.0713598>
- 544 52. Gonzalez-Lombana C, Gimblet C, Bacellar O, Oliveira WW, Passos S, Carvalho LP, et al. IL-  
545 17 mediates immunopathology in the absence of IL-10 following *Leishmania major*  
546 infection. *PLoS Pathog [Internet]*. 2013 Mar [cited 2016 Oct 19];9(3):e1003243. Available  
547 from: <http://www.ncbi.nlm.nih.gov/pubmed/23555256>
- 548 53. Roberts SC, Tancer MJ, Polinsky MR, Gibson KM, Heby O, Ullman B. Arginase plays a

549 pivotal role in polyamine precursor metabolism in Leishmania. Characterization of gene  
550 deletion mutants. J Biol Chem. 2004;279(22):23668–78.

551 54. Nishikawa K, Seo N, Torii M, Ma N, Muraoka D, Tawara I, et al. Interleukin-17 Induces an  
552 Atypical M2-Like Macrophage Subpopulation That Regulates Intestinal Inflammation.  
553 Heimesaat MM, editor. PLoS One [Internet]. San Francisco, USA: Public Library of  
554 Science; 2014 Sep 25;9(9):e108494. Available from:  
555 <http://dx.plos.org/10.1371/journal.pone.0108494>

556 55. Tran LS, Mittal D, Mattarollo SR, Frazer IH. Interleukin-17A Promotes Arginase-1  
557 Production and 2,4-Dinitrochlorobenzene-Induced Acute Hyperinflammation in Human  
558 Papillomavirus E7 Oncoprotein-Expressing Skin. J Innate Immun. 2015;7(4):392–404.

559 56. Chatelain R, Varkila K, Coffman RL. IL-4 induces a Th2 response in Leishmania major-  
560 infected mice. J Immunol. 1992/02/15. 1992;148(4):1182–7.

561 57. Noben-Trauth N, Paul WE, Sacks DL. IL-4- and IL-4 receptor-deficient BALB/c mice reveal  
562 differences in susceptibility to Leishmania major parasite substrains. J Immunol.  
563 1999;162(10):6132–40.

564

565

## 566 **Figures Legends**

567 **Fig 1: Experimental design and course of infection in diet-induced obese C57BL/6 mice.**

568 Animals were fed control (AIN93-G) or hypercaloric (HSB) diets *ad libitum* for four weeks. On

569 the fourth week mice were infected with  $1 \times 10^6$  metacyclic *L. major* in the ear. Weight gain and  
570 food intake were measured weekly. (A) Experimental design. (B) Weekly measurement of  
571 C57BL/6 body weight. (C) Weekly measurement of infected ear thickness during eight weeks of  
572 infection. (D) Parasite titer in the infected ear, measured by limiting dilution. Statistical analysis  
573 was performed by Student's *t* test (\* $p < 0.05$ ; \*\* $p < 0.005$ ). Results are representative of at least 4  
574 independent experiments,  $n = 4$  mice/group.

575

576 **Fig 2: HSB diet-induced obesity leads to more inflammation in the infected ear.**

577 Representative photomicrographs of ear histological sections from C57BL/6 mice submitted to  
578 HSB and AIN93-G diets and infected with *L. major*. (A, B and C) photomicrography from control  
579 mice 2, 4 and 8 weeks post infection. The cellular infiltration is predominantly  
580 polymorphonuclear (Insert in A, B), focal and discrete to moderate infiltration in the papillary  
581 dermis and deep dermis accompanied by mild to moderate thickening of the dermis; erosion  
582 and ulceration of the epidermis, predominantly polymorphonuclear inflammatory process with  
583 discrete mast cell hyperplasia (Insert in C) and thickening of the dermis, moderate to severe at  
584 eight weeks post infection. (D, E and F) photomicrography from HSB-fed mice 2, 4 and 8 weeks  
585 post infection. Ulcerated epidermis, predominantly polymorphonuclear and focal inflammatory  
586 process in the dermis and hypodermis, with thickening of the dermis, both of intense character,  
587 and tissue parasitism (Insert in D) in animals belonging to the obese group, 2 weeks post  
588 infection; moderate thickening of the dermis and inflammatory infiltrate also moderate,  
589 predominantly polymorphonuclear (Insert in E) and focal, in the papillary dermis, deep dermis

590 and hypodermis 4 weeks post infection; ulcerated epidermis, predominantly  
591 polymorphonuclear and focal inflammatory process in the dermis and hypodermis with  
592 thickening of the dermis, both moderately characterized with moderate mast cell hyperplasia  
593 (Insert in F), 8 weeks after infection. Hematoxylin-Eosin. Bar = 25mm.

594

595 **Fig 3: Diet-induced obesity increases the concentration of *L. major* specific immunoglobulins**  
596 **in C57BL/6 serum.** Total IgG (A), IgM (B), IgG1 (C) and IgG2a (D) were measured in sera from  
597 mice fed control (AIN93G) and hypercaloric (HSB) diet. ELISA was performed at 2, 4 and 8 weeks  
598 of infection. For sensitization, *L. major* antigen at 20µg/ml was used. To measure IgG, sera  
599 were diluted 1:1000, and 1:100 for IgG1, IgG2a and IgM. Statistical analysis was performed by  
600 Student's *t* test (\* $p < 0.05$ ; \*\* $p < 0.005$ ). Results are representative of at least two independently  
601 experiments,  $n = 4$  mice/group.

602

603 **Fig 4: Cytokine production by lymph node cells in culture.** Cytokine concentrations were  
604 measured by ELISA in cell culture supernatants stimulated *in vitro* with 50µg/ml of *L. major*  
605 antigen. Cells were collected 2, 4 and 8 weeks after infection and adjusted for  $5 \times 10^6$ /mL of  
606 culture and incubated during 72h. (A) IFN-γ; (B) TNF-α; (C) IL-4; (D) IL-10 and (E) IL-17. Statistical  
607 analysis was performed by Student's *t* test (\*  $p < 0.05$ ). Results are representative of at least two  
608 independent experiments,  $n = 4$  mice/group.

609

610 **Fig 5: *In vitro* macrophage infection.** To measure the percentage of infected macrophage and  
611 the amastigote number in infected macrophage, cells were collected from the peritoneal cavity  
612 after thioglycotate stimulation and cultured at  $1 \times 10^5$ /ml. The infections was performed with 5  
613 parasites per macrophage 24h after adhesion. Parasite counts were performed at 4 and 72  
614 hours post infection. Arginase and NO were measured 72h after infection, as described in  
615 Materials and Methods. (A) Percentage of infected macrophages; (B) Amastigote number per  
616 infected macrophage and (C) Infection index; (D) NO production; and (E) Arginase activity.  
617 Statistical analysis was performed by Student's *t* test (\* $p < 0.05$  between macrophages from  
618 control mice versus obese mice; &  $p < 0.05$  comparing different culture conditions in the same  
619 group). Results are representative of two independently experiments,  $n=3$ ).

620

621 **Sup Fig 1: Metabolic evaluation in mice fed HSB diet before and after *L. major* infection.** (A)  
622 Fasting glycaemia. (B) Glucose oral tolerance test performed eight weeks post infection. Mice  
623 were fasted for six hours and received a 30% glucose solution *per os*. Blood was taken at time 0  
624 and 15, 30, 60 and 90 minutes after administration of the glucose solution. (C) Total blood  
625 cholesterol eight weeks post infection. (D) Serum leptin concentration measured by ELISA (8  
626 weeks post infection and 12 weeks post diet consumption). Statistical analysis was performed  
627 by Student's *t* test (\*  $p < 0.05$ ; \*\*  $p < 0.005$  and \*\*\*  $p < 0.0005$ ). Results are representative of at  
628 least 4 independently experiments,  $n=4$  mice/group.

629



630 **Sup Fig 2: Cytokine profile in the adipose tissue extract from C57BL/6 mice infected with *L.***

631 ***major.*** The peritoneal adipose tissue extracts were prepared (100mg/ml of buffer) and ELISA  
632 was performed to measure concentrations of IFN-  $\gamma$ , TNF- $\alpha$ , IL-10, IL-17 and IL-4. (A) IFN-  $\gamma$ ; (B)  
633 TNF- $\alpha$ ; (C) IL-10; (D) IL-17. IL-4 values were below the detection limit. Statistical analysis was  
634 performed by Student's *t* test (\*  $p < 0,05$ ). Results are representative of at least two  
635 independently experiments,  $n=4$ mice/group.

636

637





Histology of infected ear

2wpi

4wpi

8wpi

AIN93G

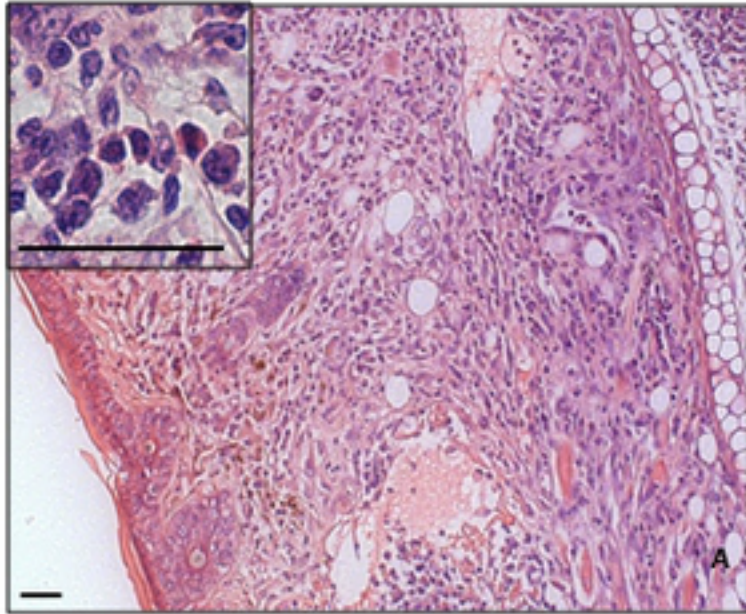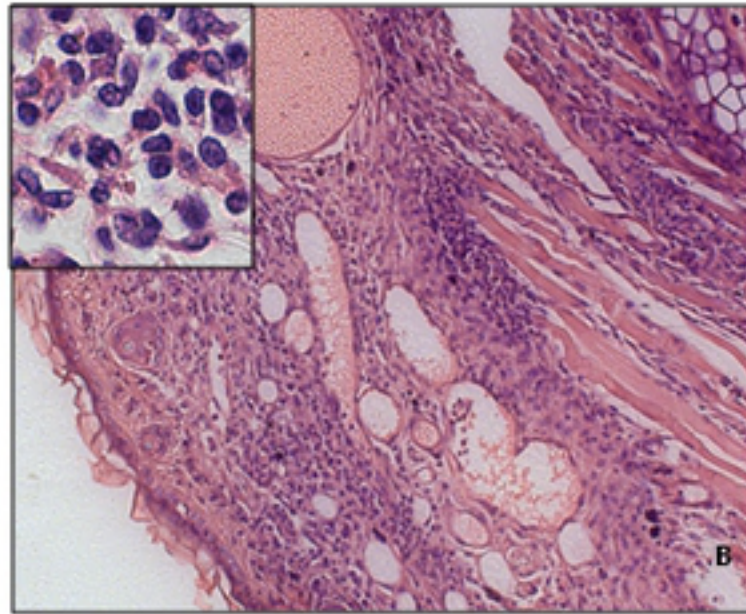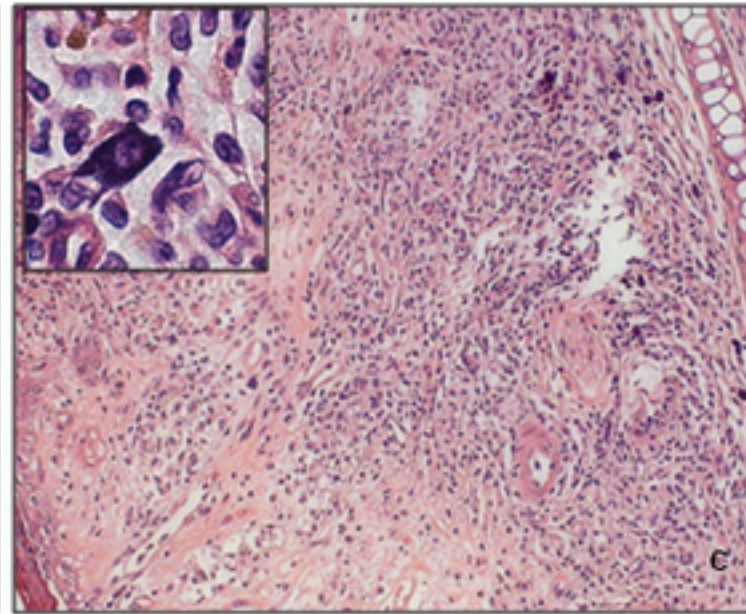

HSB

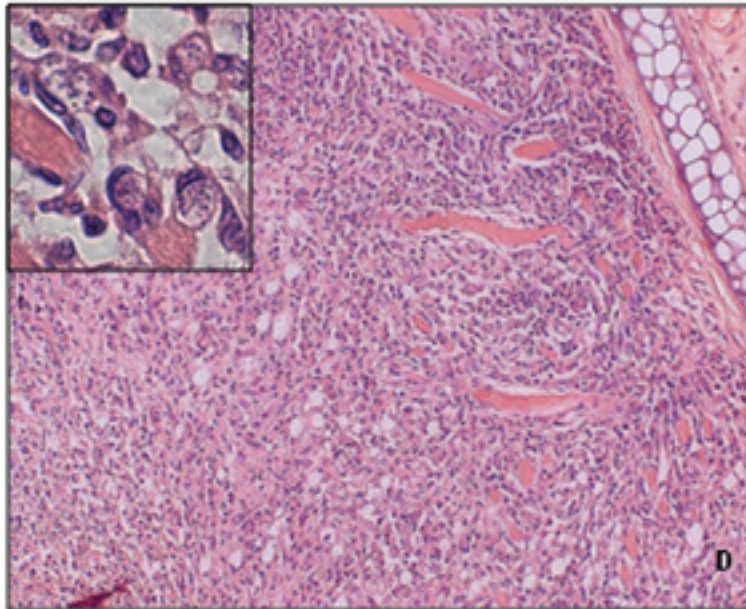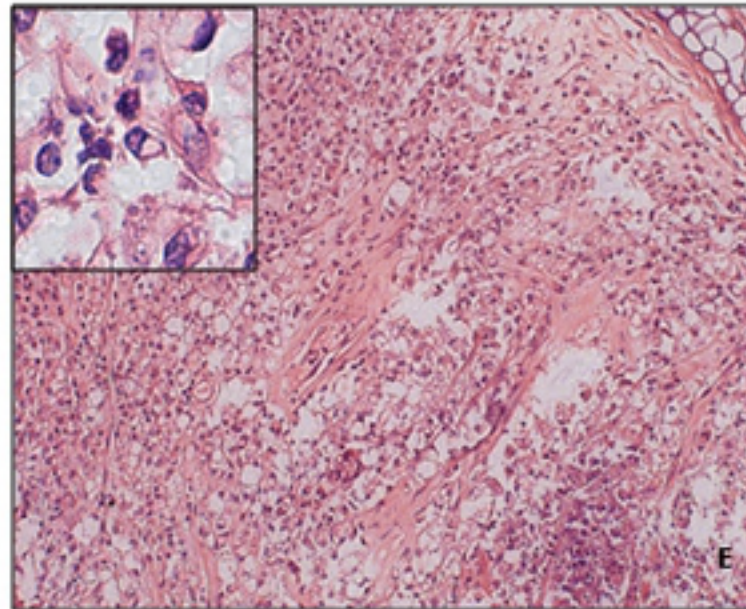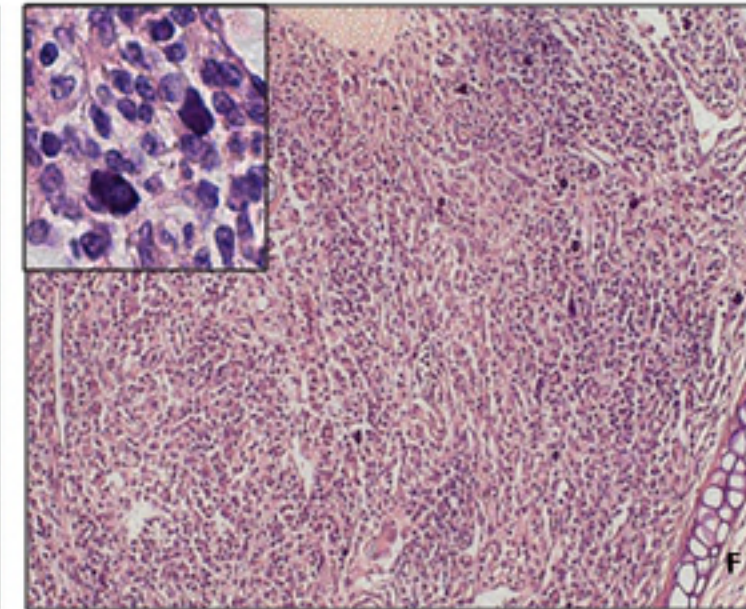



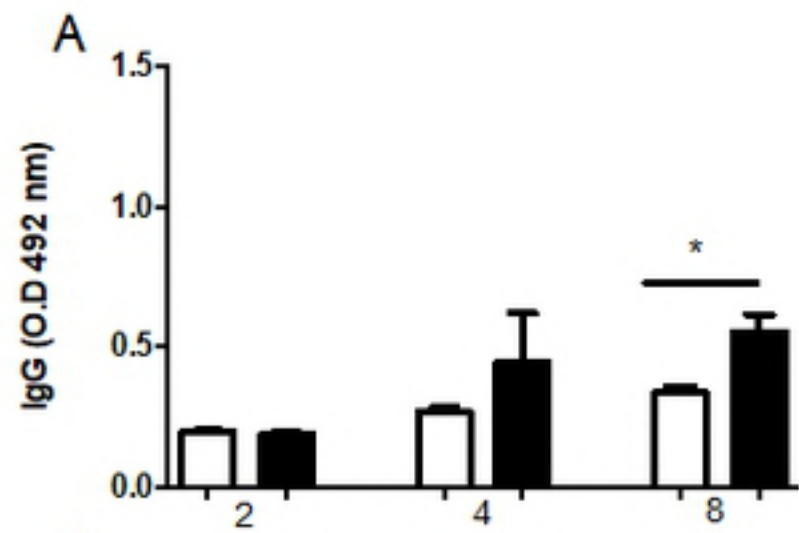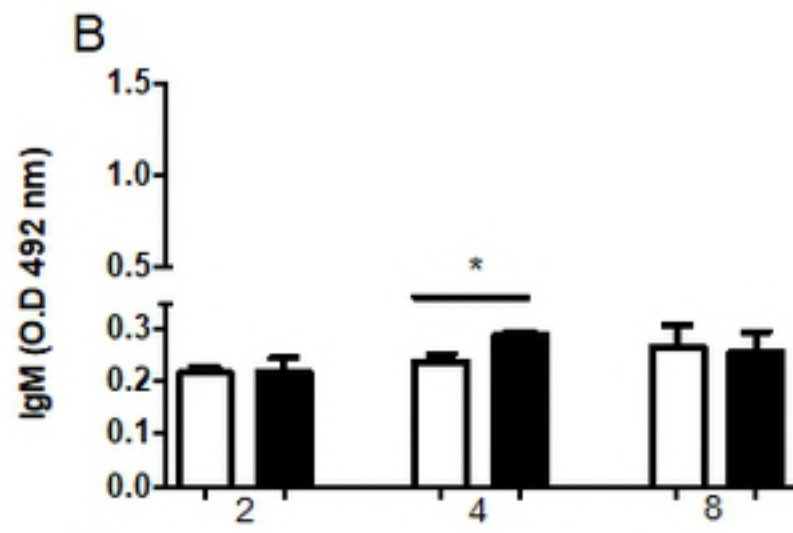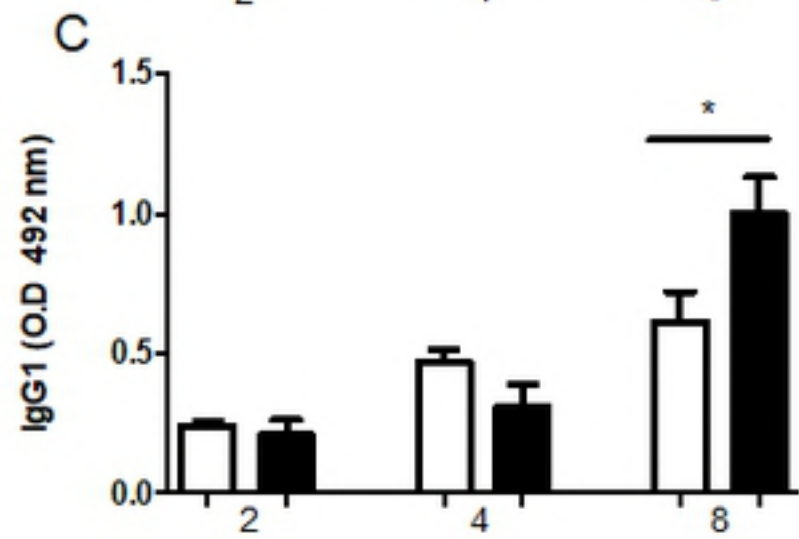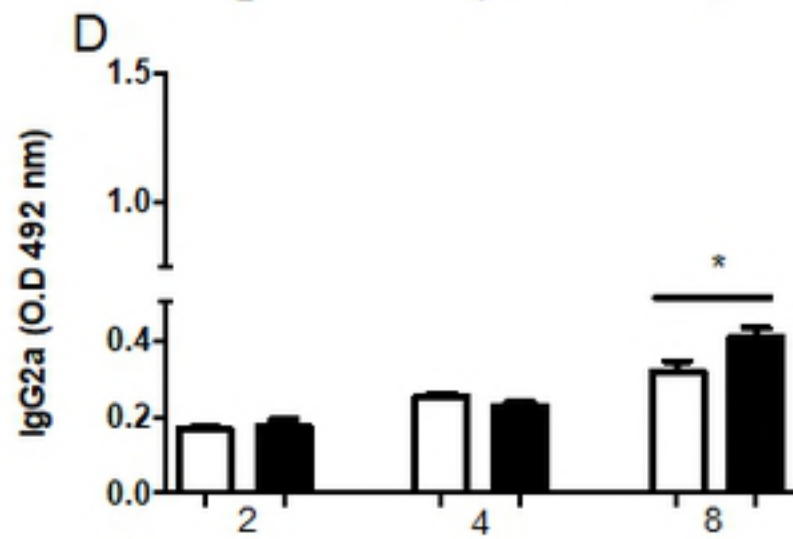

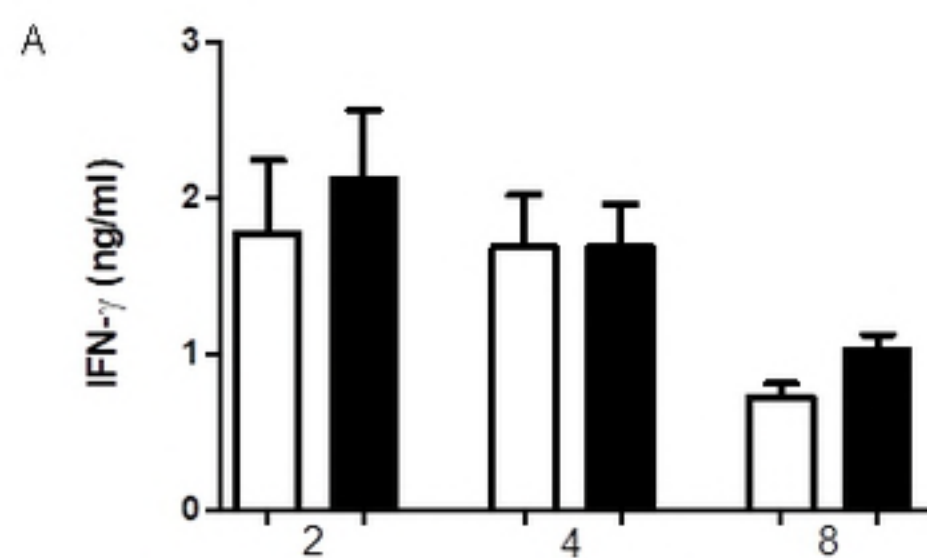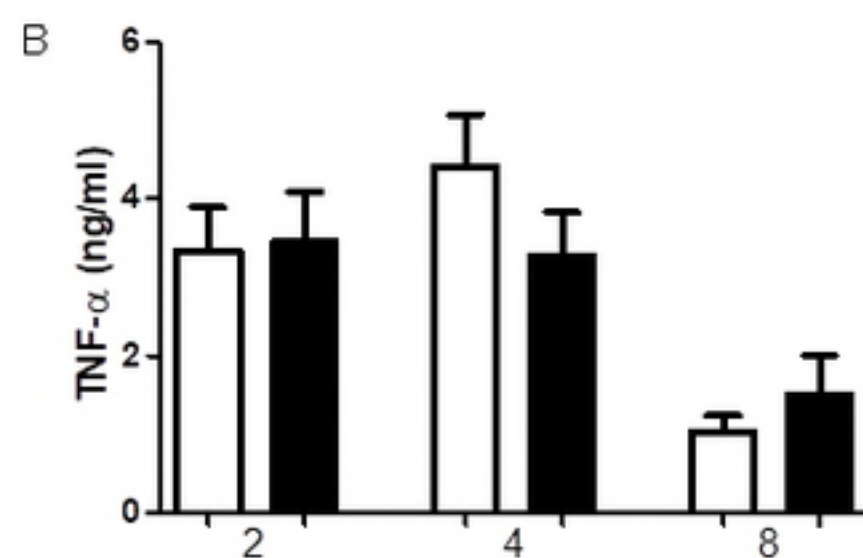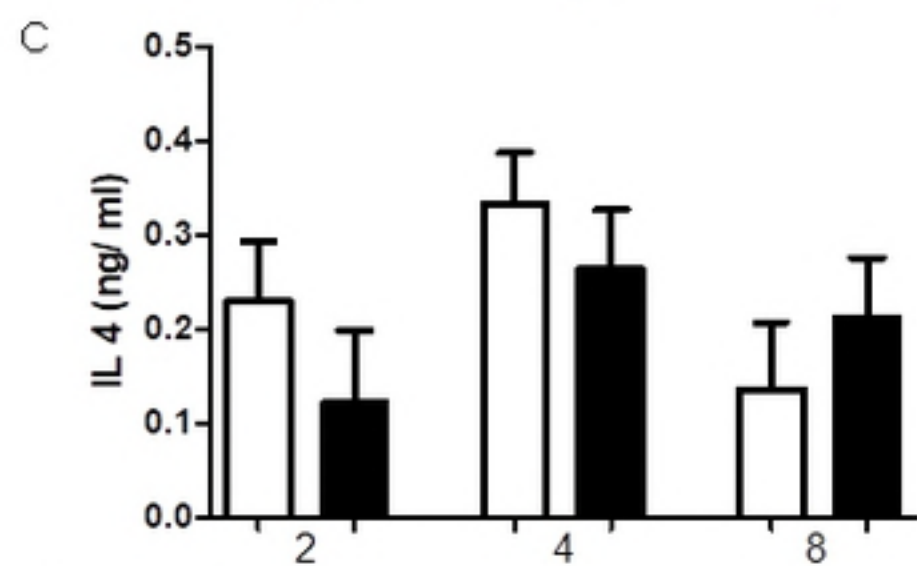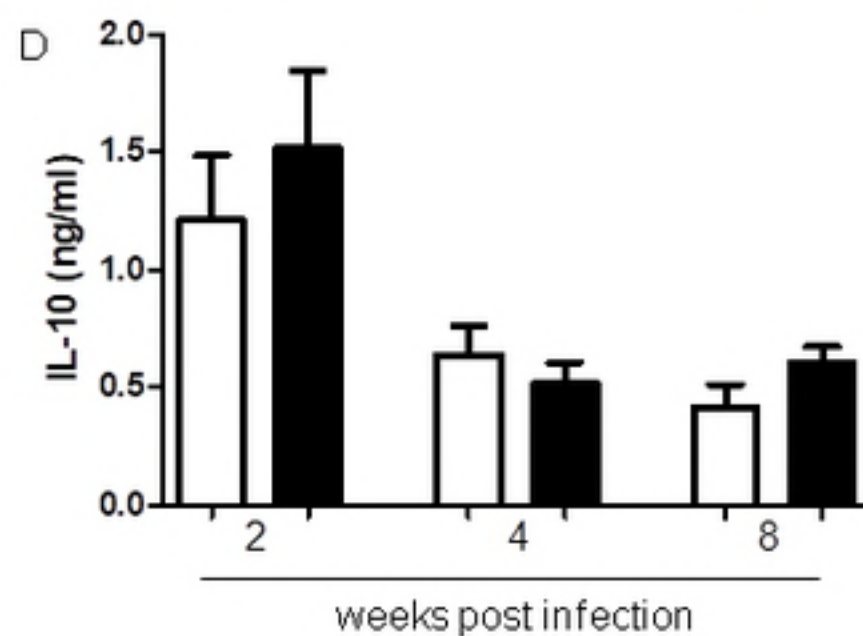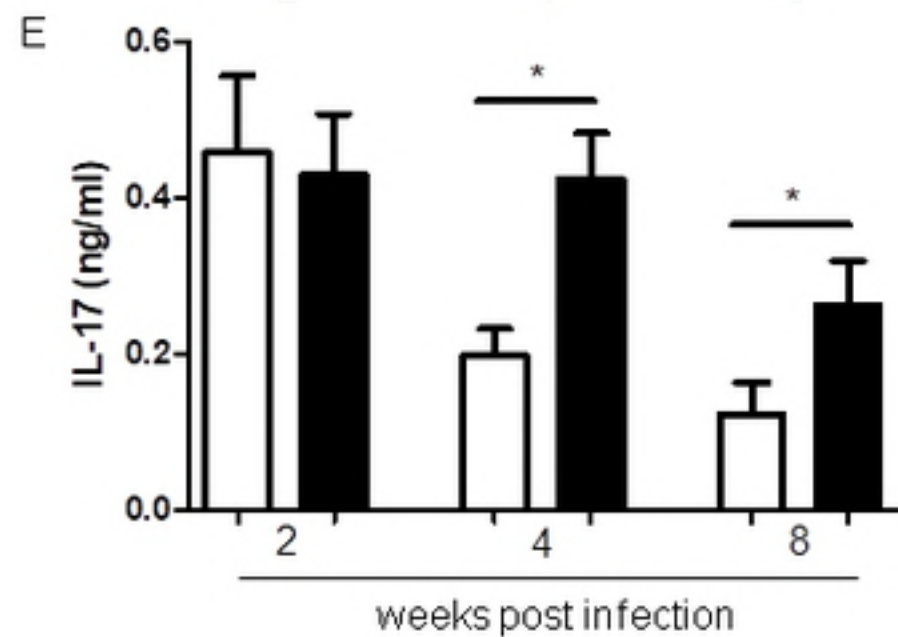

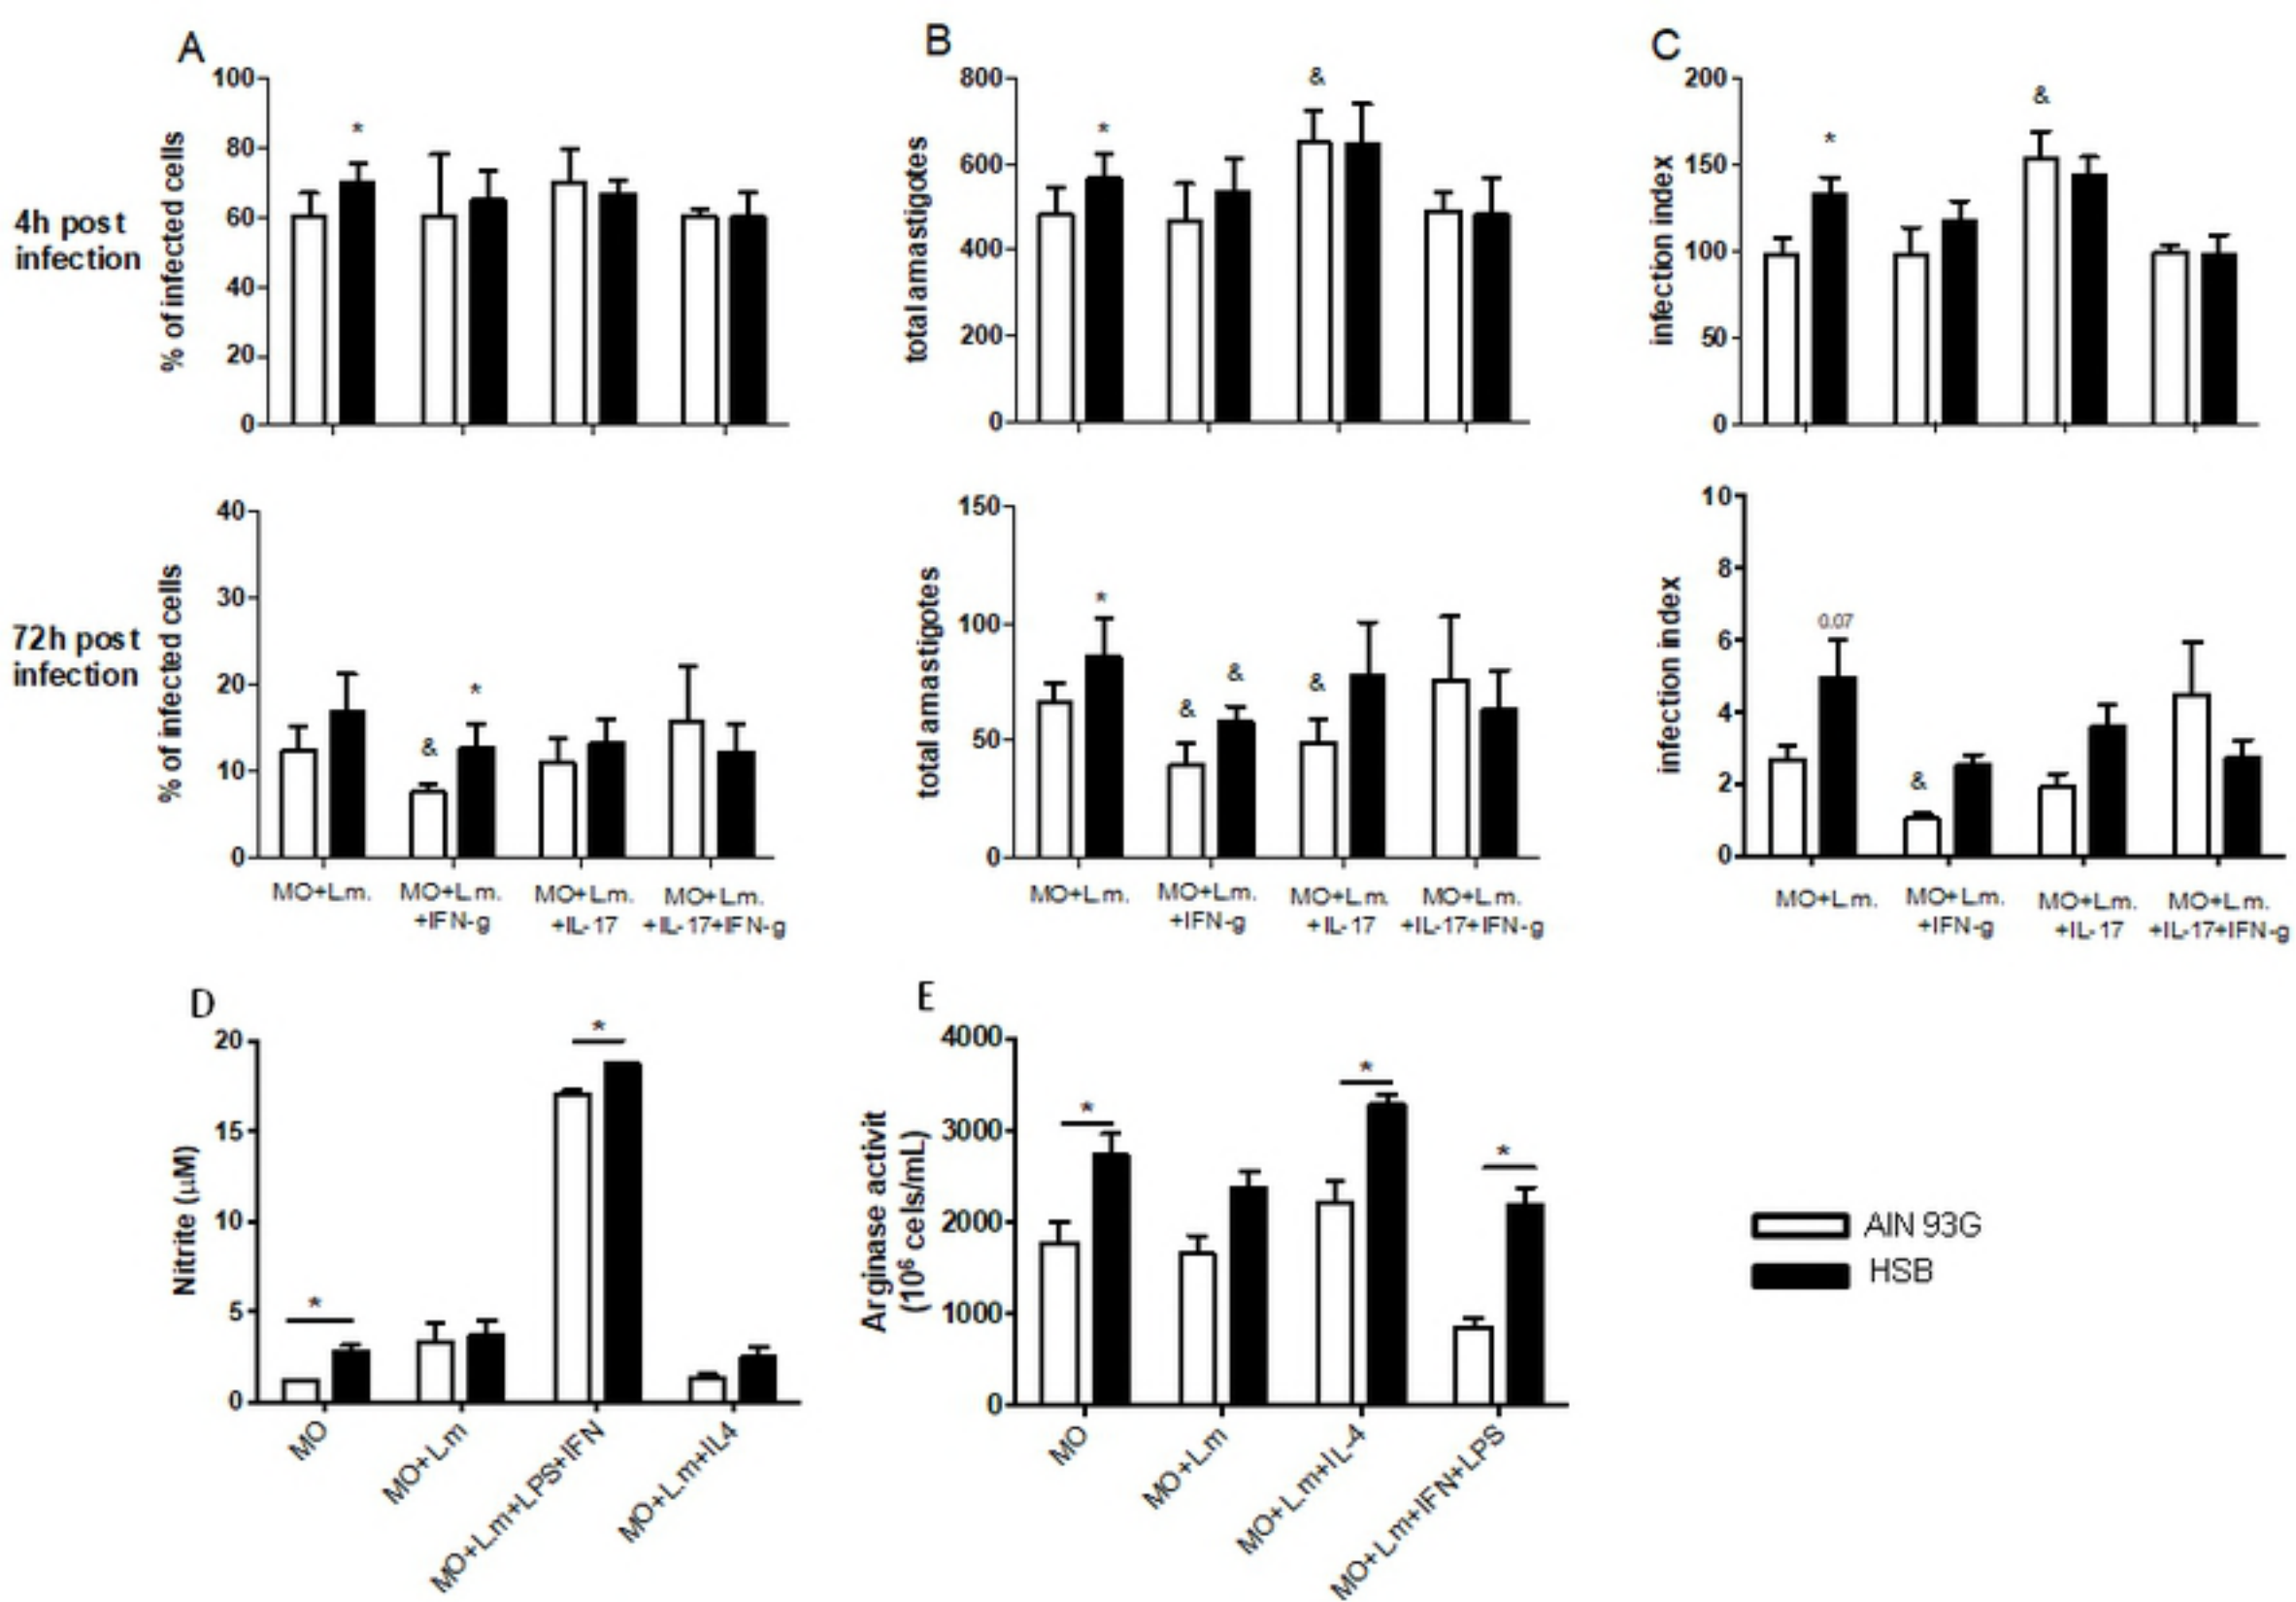

Source: https://www.biorxiv.org/content/10.1101/342642v1.full.pdf
